# Supplementary material for: JAK‐STAT pathway activation in response to spinal cord injury in regenerative and non‐regenerative stages of Xenopus laevis
Source: PubMed Central journal article supplement (PMC5350081; doi:10.1002/reg2.74), 2017-03-14
Supplement: REG2-4-21-s002.pdf [file REG2-4-21-s002.pdf]

**Table S1.** Primers used in this study.

| <b>Gen</b>    | <b>Forward</b>        | <b>Reverse</b>          |
|---------------|-----------------------|-------------------------|
| <i>efl1a1</i> | ACGCGTGGGTAAGTGTCCACC | GGCCAGTTGTTGTGGACTTTCAG |
| <i>socs3</i>  | TGCCTGACCCAGGGATCTTA  | AAACACACAATTCCCGCAGC    |
| <i>leptin</i> | GTGACATGGAGAACCTCCGC  | GGCTGTGTTTTCTGGCTGTG    |
| <i>lif</i>    | TTTGTGTGCACTTTGGAGCG  | TGCAGAGCACTTGTGCCTAA    |
| <i>gr</i>     | GTCCTGCAACGTTACCACA   | TCTGGAACAGAGCTATCATATCC |
